# Supplementary material for: ROS Stress Resets Circadian Clocks to Coordinate Pro-Survival Signals
Source: PubMed Central journal article supplement (PMC3846904; doi:10.1371/journal.pone.0082006), 2013-12-02
Supplement: pone.0082006.s001.pdf [file pone.0082006.s001.pdf]

**A**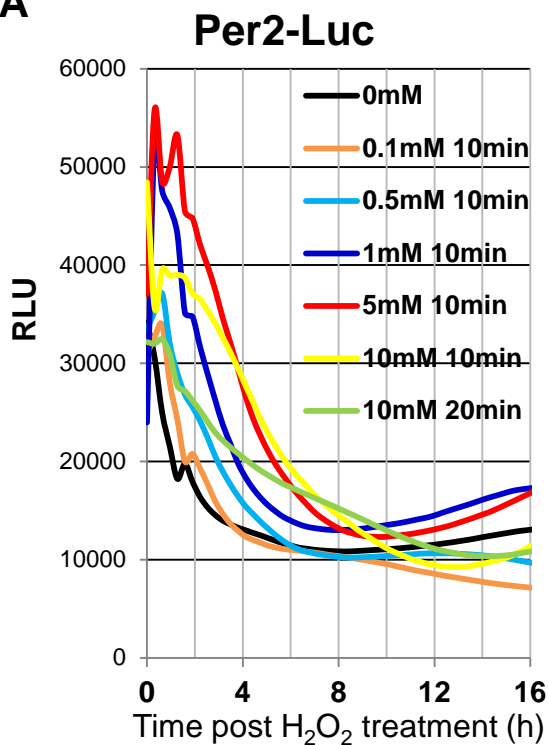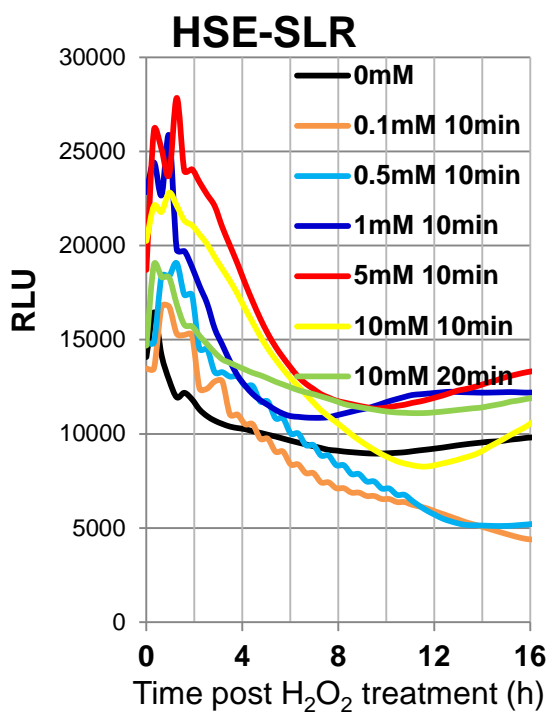**B**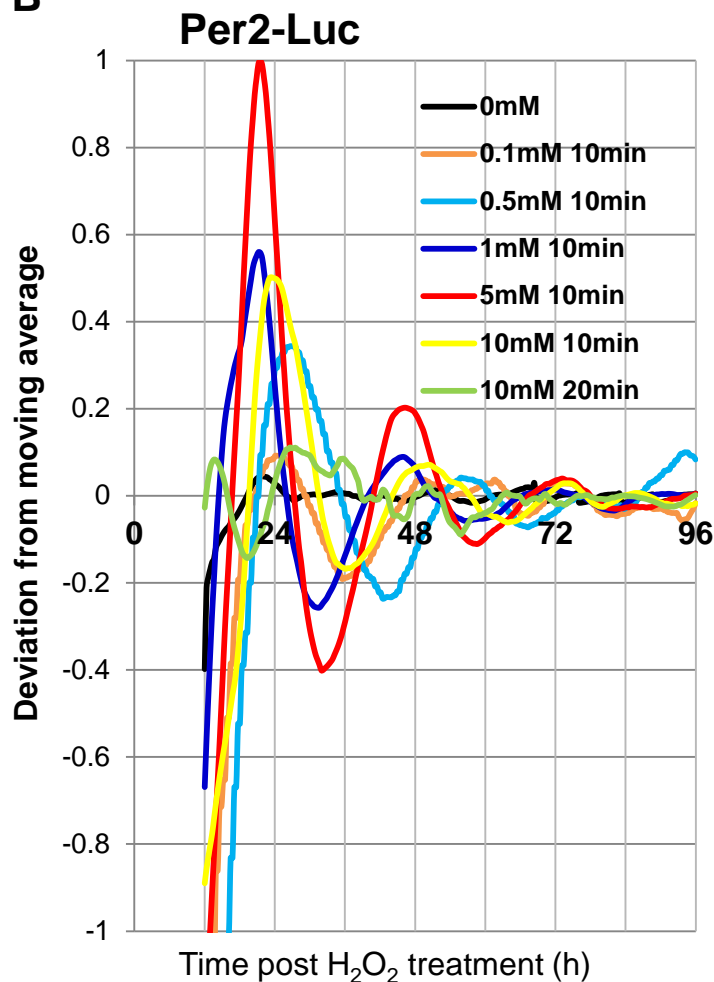**C**

|           | survival (1w) |
|-----------|---------------|
| (-)       | ++++          |
| 0.1mM 10m | ++++          |
| 0.5mM 10m | +++           |
| 1mM 10m   | +++           |
| 5mM 10m   | +++           |
| 10mM 5m   | +++           |
| 10mM 10m  | +             |
| 10mM 20m  | -             |
