# Supplementary material for: ROS Stress Resets Circadian Clocks to Coordinate Pro-Survival Signals
Source: PubMed Central journal article supplement (PMC3846904; doi:10.1371/journal.pone.0082006), 2013-12-02
Supplement: pone.0082006.s002.pdf [file pone.0082006.s002.pdf]

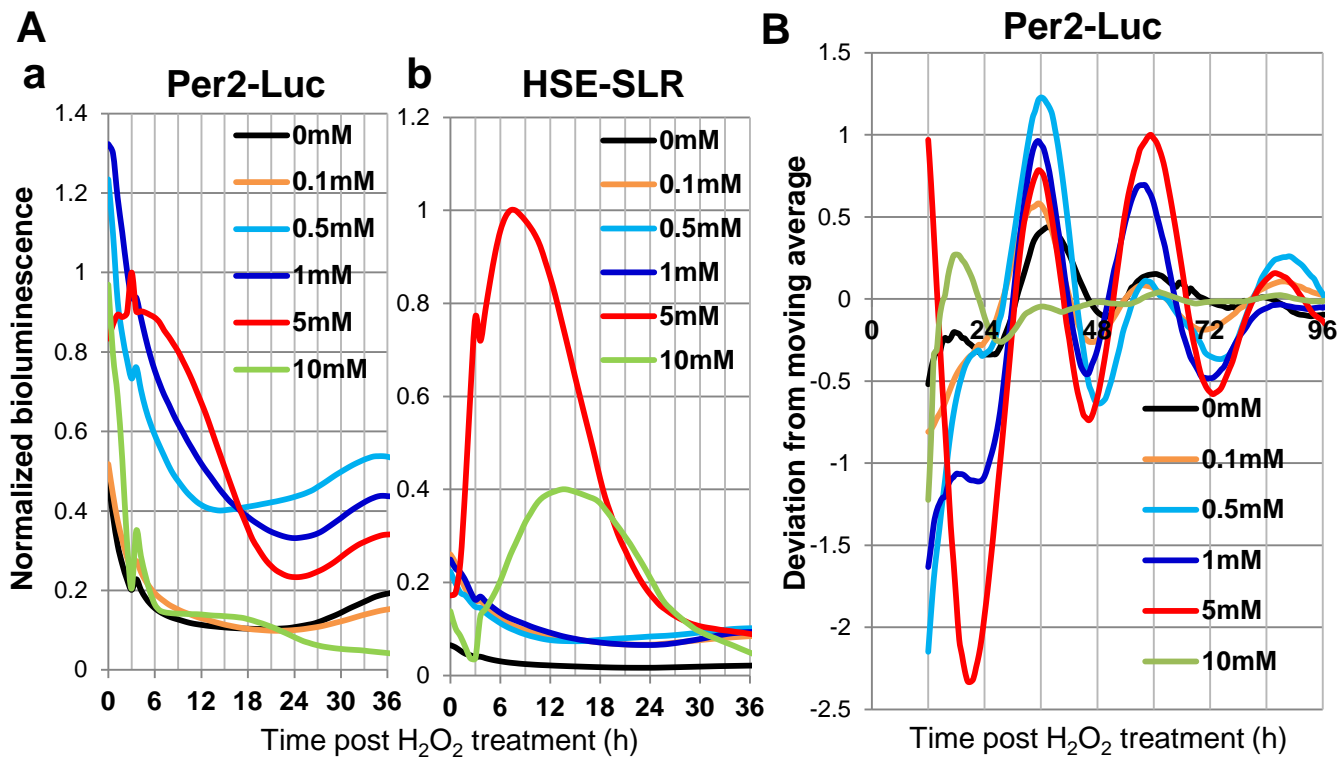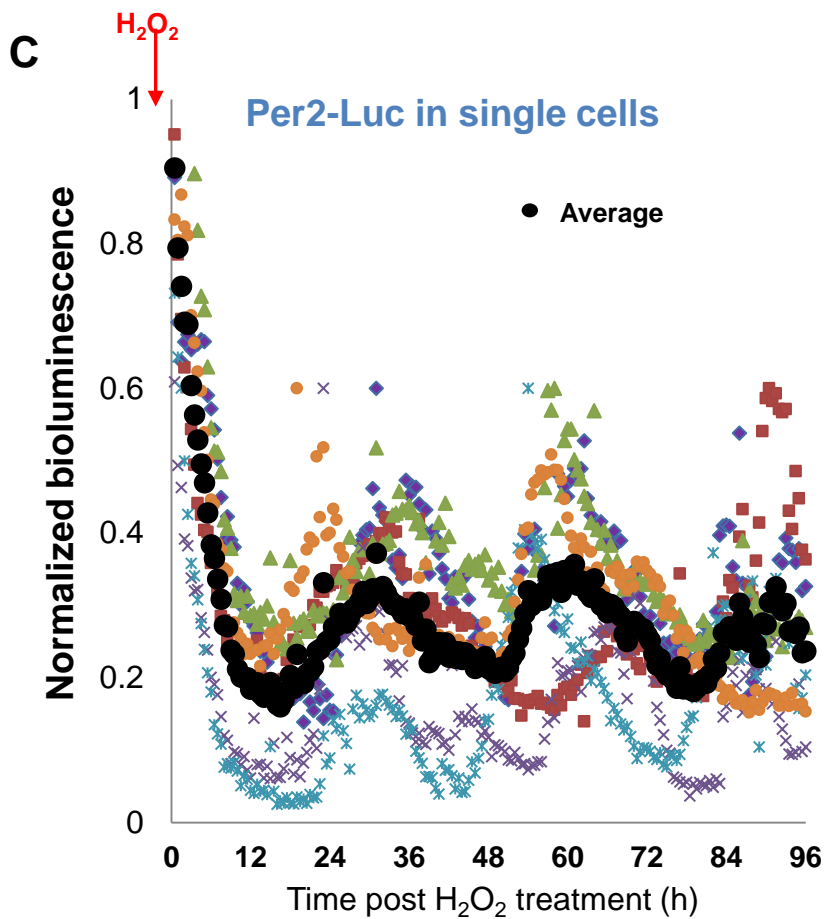

**D**

survival (1w)

|          |      |
|----------|------|
| (-)      | ++++ |
| 1mM 10m  | +++  |
| 5mM 10m  | +++  |
| 10mM 20m | -    |
