# Supplementary material for: ROS Stress Resets Circadian Clocks to Coordinate Pro-Survival Signals
Source: PubMed Central journal article supplement (PMC3846904; doi:10.1371/journal.pone.0082006), 2013-12-02

**A** Inhibitor: Pre 1h & Post 1h of H<sub>2</sub>O<sub>2</sub>

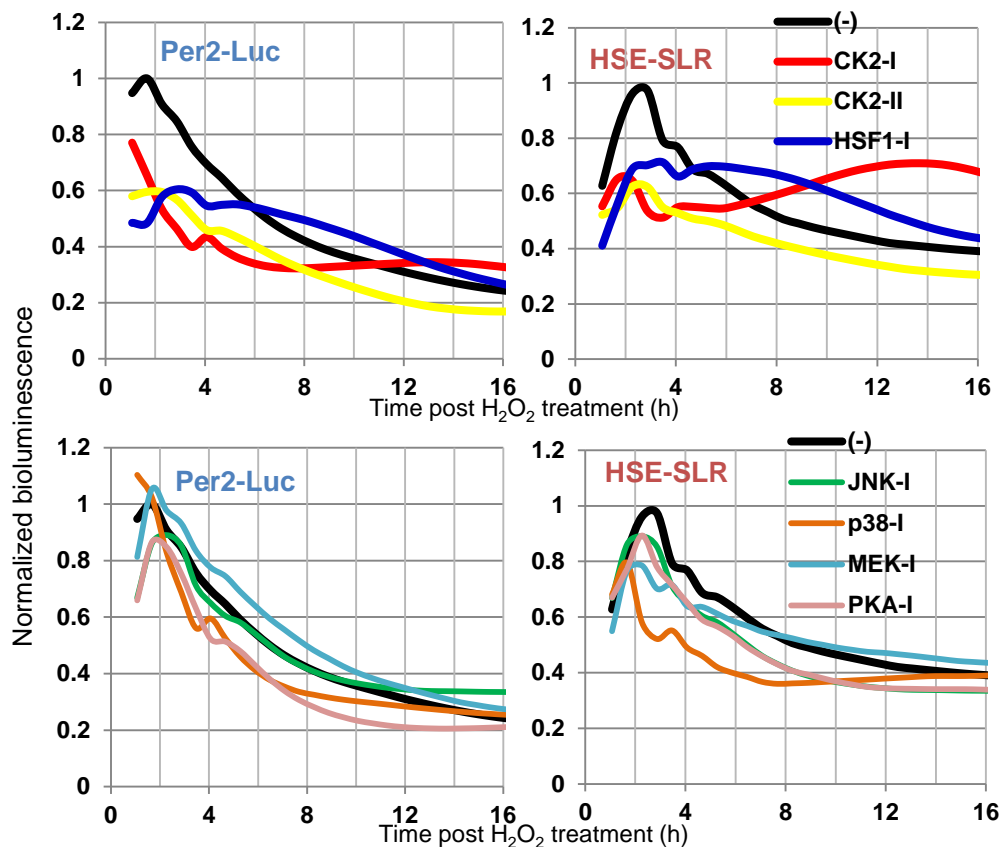

**C**

Survival (1w)

|        |      |
|--------|------|
| (-)    | ++++ |
| CK2-I  | +    |
| CK2-II | +    |
| CK1-I  | ++++ |
| JNK-I  | ++++ |
| P38-I  | ++   |
| MEK-I  | ++++ |
| PKA-I  | ++++ |
| HSF1-I | +    |

**B**

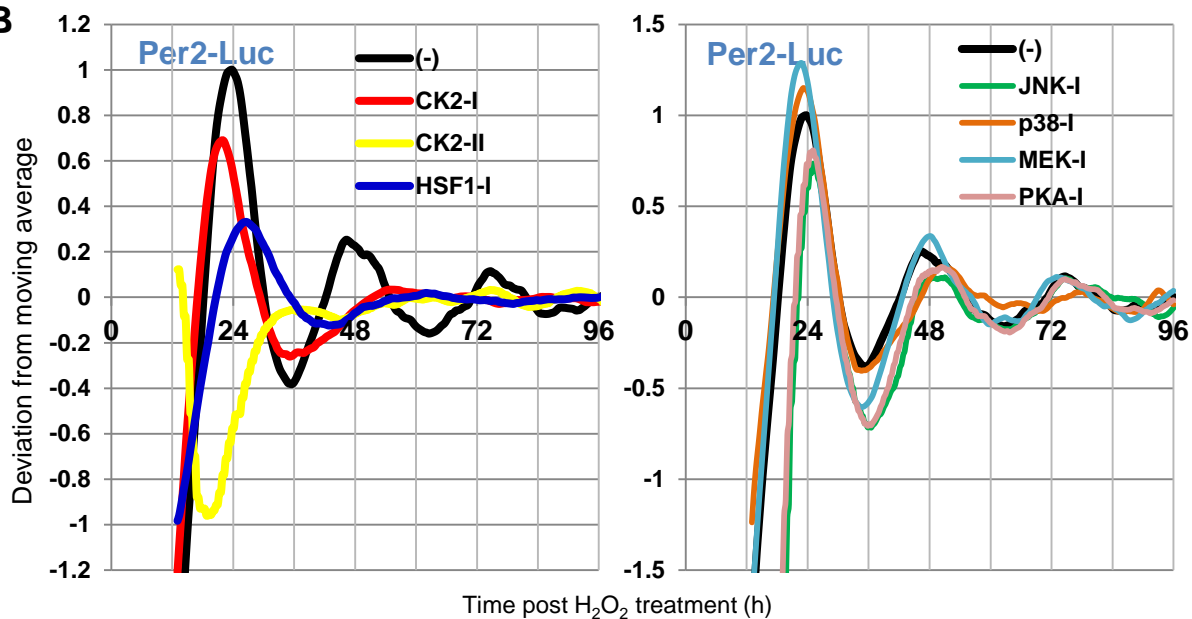

Supplement: pone.0082006.s003.pdf [file pone.0082006.s003.pdf]
