# Supplementary material for: ROS Stress Resets Circadian Clocks to Coordinate Pro-Survival Signals
Source: PubMed Central journal article supplement (PMC3846904; doi:10.1371/journal.pone.0082006), 2013-12-02
Supplement: pone.0082006.s006.pdf [file pone.0082006.s006.pdf]

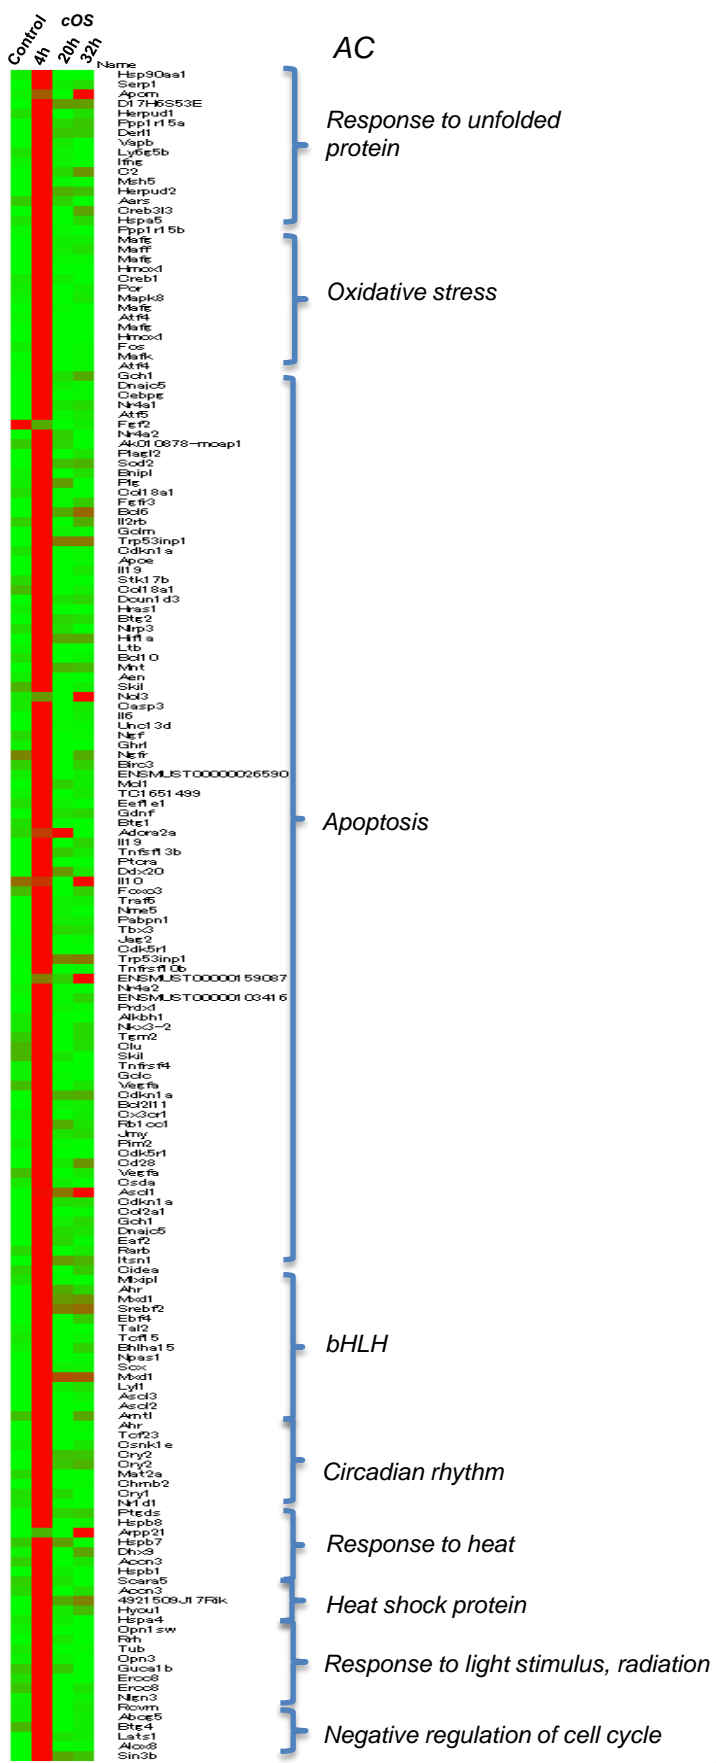

**Up-regulated at 4h post cOS**
