# Supplementary material for: ROS Stress Resets Circadian Clocks to Coordinate Pro-Survival Signals
Source: PubMed Central journal article supplement (PMC3846904; doi:10.1371/journal.pone.0082006), 2013-12-02
Supplement: pone.0082006.s007.pdf [file pone.0082006.s007.pdf]

# Critical Oxidative Stress (cOS)

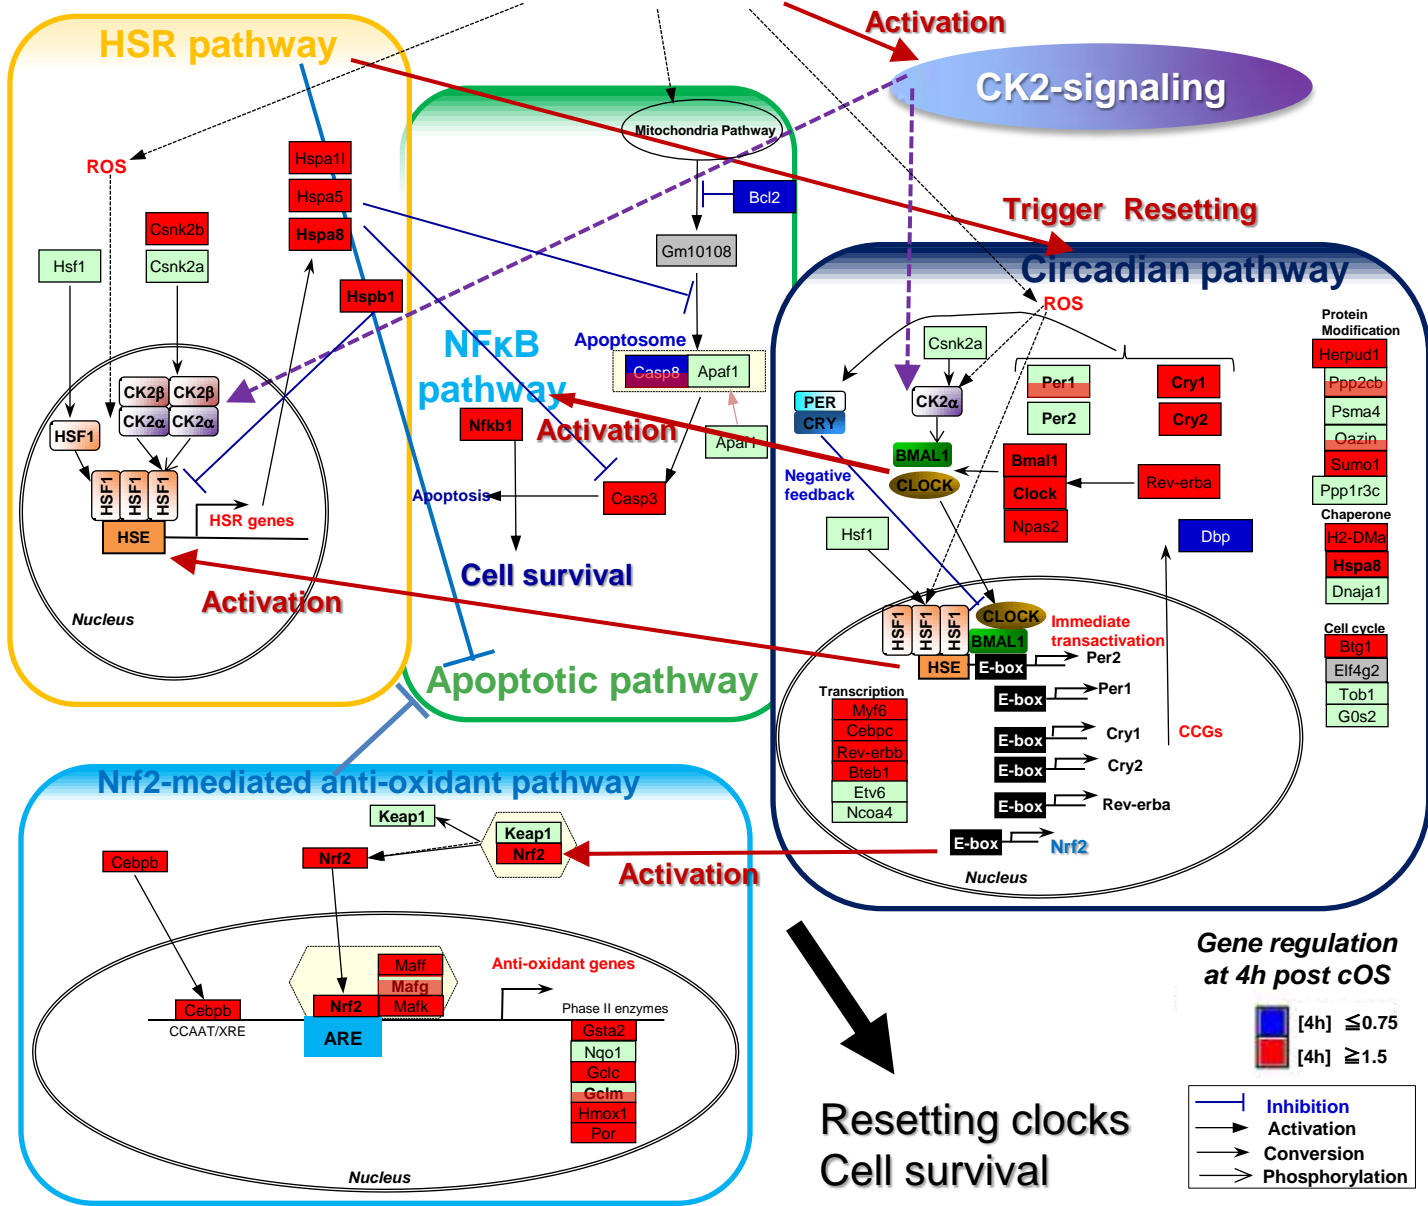

- Protein Modification**
- Herpud1
  - Ppp2cb
  - Psm4
  - Oazin
  - Sumo1
  - Ppp1r3c
- Chaperone**
- H2-DMa
  - Hspa8
  - Dnaja1
- Cell cycle**
- Btg1
  - Elf4g2
  - Tob1
  - G0s2

**Gene regulation at 4h post cOS**

[4h]  $\leq 0.75$  (Blue box)

[4h]  $\geq 1.5$  (Red box)

—| Inhibition

→ Activation

→· Conversion

→P Phosphorylation
