# Supplementary material for: ROS Stress Resets Circadian Clocks to Coordinate Pro-Survival Signals
Source: PubMed Central journal article supplement (PMC3846904; doi:10.1371/journal.pone.0082006), 2013-12-02

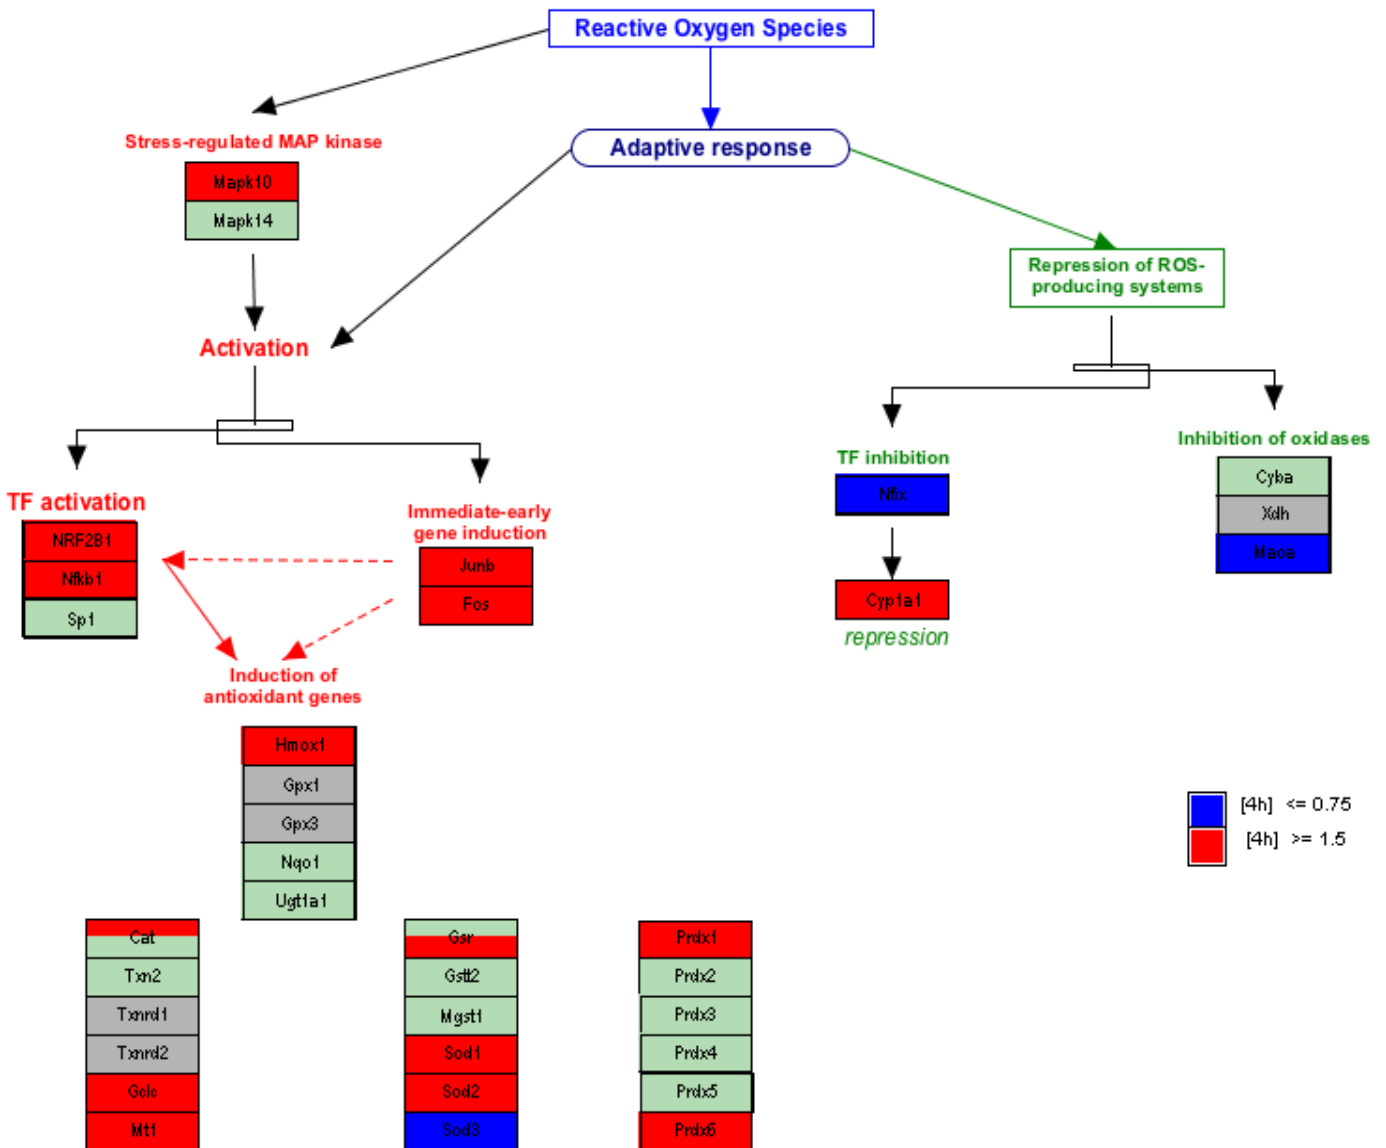

Supplement: pone.0082006.s008.pdf [file pone.0082006.s008.pdf]
