# Supplementary material for: ROS Stress Resets Circadian Clocks to Coordinate Pro-Survival Signals
Source: PubMed Central journal article supplement (PMC3846904; doi:10.1371/journal.pone.0082006), 2013-12-02
Supplement: pone.0082006.s011.pdf [file pone.0082006.s011.pdf]

Table.S2 Expression profiles of genes in cOS-evoked signaling

Probe-Gene name (alternative description)

| Control                                                                                             | cOS-4h      | cOS-20h     | cOS-32h     | 4h vs control | 20h vs 32h  |
|-----------------------------------------------------------------------------------------------------|-------------|-------------|-------------|---------------|-------------|
| 1 A_66_P117655 - Csnk2a2 (CK2a, Casein kinase 2 alpha-prime catalytic subunit)                      | 0.022107007 | 0.102096577 | 0.016753752 | 0.016498355   | 4.618290346 |
| 2 A_55_P2022845 - Csnk2a1 (CK2a, Casein kinase 2 alpha catalytic subunit)                           | 4.428198824 | 5.999354989 | 5.239524175 | 4.651122701   | 1.354807051 |
| 3 A_51_P397768 - Csnk2a1 (CK2a, Casein kinase 2 alpha catalytic subunit)                            | 0.643116719 | 0.721190786 | 0.693481619 | 0.673480229   | 1.121399529 |
| 4 A_55_P1971828 - Csnk2a1 (CK2a, Casein kinase 2 alpha catalytic subunit)                           | 0.501161797 | 0.503072645 | 0.509257197 | 0.524515205   | 1.003812837 |
| 5 A_52_P207614 - Csnk2a2 (CK2a, Casein kinase 2 alpha-prime catalytic subunit)                      | 1.462757687 | 1.07797115  | 1.26887396  | 1.280179516   | 0.736825466 |
| 6 A_55_P2022840 - Csnk2a1 (CK2a, Casein kinase 2 alpha catalytic subunit)                           | 3.774392613 | 3.071731041 | 4.013786557 | 4.301583969   | 0.813834531 |
| 7 A_51_P373379 - Csnk2b (CK2b, Casein kinase 2 beta regulatory subunit)                             | 10.2129405  | 15.47623354 | 13.02776774 | 11.50548584   | 1.515355302 |
| 8 A_55_P2408588 - Arntl (BMAL1, Brain muscle arnt-like protein)                                     | 0.934501808 | 1.961271633 | 0.585808609 | 1.060767706   | 2.09873498  |
| 9 A_52_P334670 - Clock                                                                              | 1.064832655 | 1.672356358 | 1.045277276 | 1.082123305   | 1.57053444  |
| 10 A_52_P534749 - Npas2 (neuronal PAS domain protein 2)                                             | 0.008166072 | 0.01660074  | 0.006289421 | 0.008722999   | 2.032891701 |
| 11 A_55_P1970033 - Per1 (Period1)                                                                   | 1.687263621 | 2.339634389 | 1.902384361 | 1.70348117    | 1.386644244 |
| 12 A_55_P2019327 - Per1 (Period1)                                                                   | 0.014364285 | 0.02162663  | 0.010338537 | 0.058210774   | 1.505583466 |
| 13 A_51_P282760 - Per2 (Period2)                                                                    | 0.038414261 | 0.044614949 | 0.039301931 | 0.023498851   | 1.161416303 |
| 14 A_52_P420500 - Cry1 (Cryptochrome1)                                                              | 0.039705608 | 0.113721347 | 0.041106433 | 0.028285518   | 2.864112974 |
| 15 A_55_P2016540 - Cry2 (Cryptochrome2)                                                             | 2.231400381 | 5.341192941 | 2.990971368 | 2.928895865   | 2.393650636 |
| 16 A_51_P223776 - Nr1d1 (Rev-erb-alpha)                                                             | 0.188338102 | 0.400531052 | 0.167590549 | 0.162717802   | 2.126659703 |
| 17 A_55_P2148534 - Nr1d2 (Rev-erb-beta)                                                             | 1.580534799 | 2.893102826 | 2.044634827 | 1.57913225    | 1.830458164 |
| 18 A_52_P303891 - Nr1d2 (Rev-erb-beta)                                                              | 0.805971539 | 1.689534839 | 0.963866427 | 0.741074686   | 2.096271093 |
| 21 A_55_P2032081 - Dbp (D site albumin promoter binding protein)                                    | 0.951097244 | 0.375084617 | 1.542301584 | 0.977207468   | 0.394370417 |
| 22 A_55_P2032079 - Dbp (D site albumin promoter binding protein)                                    | 0.915865144 | 0.400449244 | 1.495995878 | 0.947904991   | 0.437236035 |
| 23 A_51_P386794 - Myf6 (myogenic factor 6)                                                          | 0.009600689 | 0.017909576 | 0.011023921 | 0.009715177   | 1.865446949 |
| 24 A_65_P19780 - Bteb1 (Klf9 Kruppel-like factor 9)                                                 | 19.20736888 | 34.84841174 | 23.43206183 | 22.94765773   | 1.814325114 |
| 25 A_55_P2230913 - Etv6 (ets variant gene 6 (TEL oncogene))                                         | 0.53472693  | 0.729647658 | 0.568136682 | 0.54216151    | 1.364523866 |
| 26 A_55_P2000404 - Etv6 (ets variant gene 6 (TEL oncogene))                                         | 0.010589186 | 0.009092382 | 0.008162505 | 0.011298868   | 0.85864787  |
| 27 A_55_P2016862 - Ncoa4 (nuclear receptor coactivator 4)                                           | 4.718137293 | 4.572982189 | 5.030869267 | 5.24568581    | 0.969234659 |
| 28 A_51_P434101 - Herpud1 (HERP; Mif1)                                                              | 3.08659993  | 6.873791063 | 2.539239719 | 3.069133072   | 2.226978299 |
| 29 A_55_P1994913 - Ppp2cb (protein phosphatase 2, catalytic subunit, beta isozyme)                  | 5.118301735 | 6.716249847 | 5.464496228 | 5.412994792   | 1.312202796 |
| 30 A_65_P09443 - Psm4 (proteasome subunit, alpha type 1)                                            | 8.535616747 | 9.828103835 | 7.991173623 | 7.778252129   | 1.151422812 |
| 31 A_52_P81468 - Psm4 (proteasome subunit, alpha type 1)                                            | 6.049184653 | 6.89307494  | 5.375735666 | 5.352757891   | 1.139504799 |
| 32 A_51_P234544 - Oazin (Azin1 antizyme inhibitor 1)                                                | 5.481340662 | 8.59994361  | 5.175165499 | 4.664210823   | 1.568948939 |
| 33 A_52_P24631 - Oazin (Azin1 antizyme inhibitor 1)                                                 | 1.551837936 | 1.620173033 | 1.355871475 | 1.157899998   | 1.044034944 |
| 34 A_52_P117313 - Oazin (Azin1 antizyme inhibitor 1)                                                | 0.059195159 | 0.045866362 | 0.045410194 | 0.048265679   | 0.774332989 |
| 35 A_55_P2002155 - Sumo1 (SMT3 suppressor of mif two 3 homolog 1)                                   | 27.44914677 | 41.23967334 | 28.34171195 | 32.57932029   | 1.502402741 |
| 36 A_52_P30451 - Ppp1r3c (protein phosphatase 1, regulatory subunit 3C)                             | 0.009161177 | 0.007668151 | 0.006653674 | 0.176526221   | 0.837026836 |
| 37 A_51_P473734 - H2-Dma (histocompatibility 2, class II, locus Dma)                                | 0.076891184 | 0.910324819 | 0.113418501 | 0.13255999    | 11.83913125 |
| 38 A_55_P2087984 - Dnaj1 (DnaJ (Hsp40) homolog, subfamily A, member 1)                              | 30.21618674 | 48.14119337 | 30.51240515 | 31.51467763   | 1.593225306 |
| 39 A_55_P1992149 - Dnaj1 (DnaJ (Hsp40) homolog, subfamily A, member 1)                              | 0.075011573 | 0.098867783 | 0.081880499 | 0.086621418   | 1.31536747  |
| 40 A_55_P2181191 - Btg1 (B-cell translocation gene 1, anti-proliferative)                           | 1.934329675 | 5.433084556 | 1.559911552 | 1.416478643   | 2.808768653 |
| 41 A_55_P2098598 - Btg1 (B-cell translocation gene 1, anti-proliferative)                           | 87.76732305 | 168.7255914 | 97.15515222 | 92.84478677   | 1.922419251 |
| 42 A_51_P293339 - Tob1 (transducer of ErbB-2.1)                                                     | 0.445706992 | 0.566674638 | 0.701704491 | 0.75654407    | 1.271406211 |
| 43 A_52_P12877 - Hspa8 (heat shock protein 8, Hsc70)                                                | 12.12040667 | 21.2414817  | 10.12129509 | 10.54129859   | 1.752538696 |
| 44 A_55_P2080603 - Hspa8 (heat shock protein 8, Hsc70)                                              | 146.4024615 | 197.552049  | 135.7020778 | 153.1221307   | 1.349376554 |
| 45 A_55_P2069721 - Hspa8 (heat shock protein 8, Hsc70)                                              | 68.96469075 | 111.3798929 | 62.26732511 | 63.77060221   | 1.615027802 |
| 46 A_55_P2039284 - Hspb1 (heat shock factor binding protein 1)                                      | 0.007384785 | 0.052661397 | 0.010474603 | 0.007711258   | 7.131067052 |
| 47 A_55_P2035593 - Hsf1 (Heat shock factor-1)                                                       | 2.607223029 | 3.789790767 | 2.35594082  | 2.450844072   | 1.453573678 |
| 48 A_55_P2039284 - Hspb1 (heat shock factor binding protein 1)                                      | 0.007384785 | 0.052661397 | 0.010474603 | 0.007711258   | 7.131067052 |
| 49 A_51_P340747 - Hspa11 (HSP70-1L, heat shock 70kDa protein 1-like)                                | 0.010919889 | 0.033411024 | 0.012183643 | 0.00991201    | 3.059648683 |
| 50 A_55_P2076772 - Hspa5 (heat shock 70kDa protein 5)                                               | 57.43539987 | 148.2651789 | 45.10374746 | 61.17974973   | 2.581425031 |
| 51 A_51_P380013 - Bcl2 (B-cell CLL/lymphoma 2)                                                      | 0.236162598 | 0.136766557 | 0.162146692 | 0.186905807   | 0.57912031  |
| 52 A_51_P417701 - Apaf1 (apoptotic peptidase activating factor 1)                                   | 0.219065166 | 0.25337386  | 0.381735245 | 0.367466108   | 1.156614101 |
| 53 A_51_P247799 - Casp8 (caspase 8, apoptosis-related cysteine peptidase)                           | 1.550982599 | 0.489449731 | 0.937747479 | 1.128345305   | 0.315573967 |
| 54 A_52_P117576 - Casp3 (caspase 3, apoptosis-related cysteine peptidase)                           | 0.113614502 | 0.246418709 | 0.100339392 | 0.113127455   | 2.168901898 |
| 55 A_55_P1968743 - Nfkb1 (nuclear factor of kappa light polypeptide gene enhancer in B cells 1, p1) | 0.52713219  | 1.365273642 | 0.456943185 | 0.472502249   | 2.590002409 |
| 56 A_55_P1968738 - Nfkb1 (nuclear factor of kappa light polypeptide gene enhancer in B cells 1, p1) | 0.651195502 | 1.551116944 | 0.572660182 | 0.589424159   | 2.381952792 |
| 57 A_51_P438666 - Keap1 (kelch-like ECH-associated protein 1)                                       | 3.427946753 | 3.463824895 | 3.703179291 | 3.79786599    | 1.010466365 |
| 58 A_51_P411271 - Nfe2l2 (nuclear factor, erythroid derived 2, like 2)                              | 18.28175922 | 34.14468218 | 18.46370278 | 18.396176     | 1.867891275 |
| 59 A_55_P2165869 - Cebpb (CCAAT/enhancer binding protein (C/EBP), beta)                             | 28.96361352 | 51.97071492 | 34.99062915 | 34.85053746   | 1.794344994 |
| 60 A_52_P608322 - Mafk (v-maf musculoaponeurotic fibrosarcoma oncogene family, protein F)           | 1.755270284 | 4.30104075  | 1.92542523  | 2.10585018    | 2.450358095 |
| 61 A_55_P2177023 - Mafg (v-maf musculoaponeurotic fibrosarcoma oncogene family, protein G)          | 4.859170988 | 15.5205739  | 5.035077554 | 5.001992866   | 3.194078566 |
| 62 A_55_P2177026 - Mafg (v-maf musculoaponeurotic fibrosarcoma oncogene family, protein G)          | 3.258451226 | 10.89146789 | 3.525952892 | 3.377794595   | 3.342529053 |
| 63 A_66_P116632 - Mafg (v-maf musculoaponeurotic fibrosarcoma oncogene family, protein G)           | 20.95441006 | 64.92384777 | 22.22348705 | 22.5518878    | 3.098338134 |
| 64 A_55_P2047748 - Mafg (v-maf musculoaponeurotic fibrosarcoma oncogene family, protein G)          | 6.302027282 | 23.3222457  | 7.540292035 | 7.444378968   | 3.700749541 |
| 65 A_55_P1953241 - Mafk (v-maf musculoaponeurotic fibrosarcoma oncogene family, protein K)          | 1.008209214 | 3.399426083 | 1.05495526  | 1.068461056   | 3.371746693 |
| 66 A_55_P2170454 - Gsta2 (glutathione S-transferase alpha 2)                                        | 0.009319264 | 0.115060536 | 0.007052737 | 0.009916763   | 12.34652608 |
| 67 A_51_P424338 - Nqo1 (NAD(P)H dehydrogenase, quinone 1)                                           | 0.402763123 | 0.443422721 | 0.412452132 | 0.196859167   | 1.100951641 |
| 68 A_51_P365019 - Gclc (glutamate-cysteine ligase, catalytic subunit)                               | 2.932332497 | 10.82289237 | 2.801351661 | 2.556717746   | 3.690881706 |
| 69 A_51_P320089 - Gclm (glutamate-cysteine ligase, modifier subunit)                                | 0.563401199 | 1.803172352 | 0.613133187 | 0.592478969   | 3.200512095 |
| 70 A_55_P2029687 - Hmox1 (heme oxygenase (decycling) 1)                                             | 0.391591377 | 2.936790189 | 0.364830108 | 0.406271396   | 7.499629362 |
| 71 A_51_P263965 - Hmox1 (heme oxygenase (decycling) 1)                                              | 3.996637986 | 39.04096207 | 3.84818858  | 3.640141671   | 9.768450935 |
| 72 A_55_P2029574 - Por (P450 (cytochrome) oxidoreductase)                                           | 10.97784523 | 24.26837493 | 10.05080395 | 10.91844956   | 2.210668344 |

Red:  $\geq 1.5$  Blue:  $\leq 0.75$  Red:  $\geq 1.5$  Blue:  $\leq 0.75$
