# Supplementary material for: ROS Stress Resets Circadian Clocks to Coordinate Pro-Survival Signals
Source: PLoS One. 2013 Dec 2;8(12):e82006. doi: 10.1371/journal.pone.0082006 (PMC3846904; doi:10.1371/journal.pone.0082006)
Supplement: Table S1 — Expression profiles of genes belonging to the relevant annotation clusters. Microarray analysis of gene expression in NIH-3T3:Per2-Luc with/without cOS-pulse was performed. AC, ID, name and value of the genes for the heatmap (Figure S6) are shown. Circadian fluctuated genes are highlighted blue (higher expression 32 h post cOS-pulse) or red (higher expression 20 h post cOS-pulse). (PDF) [file pone.0082006.s010.pdf]

| Table.S1 Expression profiles of genes belonging to the relevant annotation clusters. |         |               |           |          |          |            |          |            |            |
|--------------------------------------------------------------------------------------|---------|---------------|-----------|----------|----------|------------|----------|------------|------------|
| cOS-4h                                                                               | Cluster | ID            | Name      | Control  | cOS-4h   | cOs-20h    | cOs-32h  | 4h vs cont | 20h vs 32h |
| Up                                                                                   | AC8     | A_55_P2057946 | Hsp90aa1  | 26.3673  | 61.33132 | 23.4987645 | 23.61329 | 2.326036   | 0.99514986 |
| Up                                                                                   | AC8     | A_52_P520408  | Serp1     | 3.669372 | 9.261045 | 4.10309256 | 4.410527 | 2.523878   | 0.93029521 |
| Up                                                                                   | AC8     | A_52_P150236  | Apom      | 0.01759  | 0.089602 | 0.01260843 | 0.129334 | 5.094072   | 0.09748734 |
| Up                                                                                   | AC8     | A_51_P275751  | D17H6S53  | 0.064985 | 0.149215 | 0.09903823 | 0.098551 | 2.296147   | 1.00494357 |
| Up                                                                                   | AC8     | A_51_P434101  | Herpud1   | 3.0866   | 6.873791 | 2.53923972 | 3.069133 | 2.226978   | 0.82734755 |
| Up                                                                                   | AC8     | A_55_P2136880 | Ppp1r15a  | 5.79568  | 17.30475 | 7.46964666 | 8.470225 | 2.985801   | 0.8818711  |
| Up                                                                                   | AC8     | A_51_P504522  | Derl1     | 3.11235  | 7.161309 | 4.06104918 | 3.995394 | 2.300933   | 1.01643277 |
| Up                                                                                   | AC8     | A_52_P556140  | Vapb      | 7.208405 | 15.55662 | 8.02569984 | 7.370174 | 2.158122   | 1.08894312 |
| Up                                                                                   | AC8     | A_55_P1972133 | Ly6g5b    | 0.049459 | 0.156349 | 0.04240137 | 0.03623  | 3.161208   | 1.17032701 |
| Up                                                                                   | AC8     | A_52_P68893   | Ifng      | 0.011763 | 0.061247 | 0.01202992 | 0.009427 | 5.206937   | 1.27616334 |
| Up                                                                                   | AC8     | A_51_P497985  | C2        | 0.03062  | 0.093699 | 0.04062746 | 0.058293 | 3.060033   | 0.69695142 |
| Up                                                                                   | AC8     | A_51_P429865  | Msh5      | 0.010999 | 0.114934 | 0.01313893 | 0.009109 | 10.44931   | 1.44235571 |
| Up                                                                                   | AC8     | A_51_P102860  | Herpud2   | 0.637043 | 1.286006 | 0.83723516 | 0.795415 | 2.018712   | 1.05257715 |
| Up                                                                                   | AC8     | A_55_P2079291 | Aars      | 0.019526 | 0.061086 | 0.01718259 | 0.008462 | 3.128511   | 2.03064662 |
| Up                                                                                   | AC8     | A_55_P2174987 | Creb3l3   | 0.06464  | 0.238766 | 0.06134447 | 0.127368 | 3.693803   | 0.48163248 |
| Up                                                                                   | AC8     | A_55_P2076772 | Hspa5     | 57.4354  | 148.2652 | 45.1037475 | 61.17975 | 2.581425   | 0.73723328 |
| Up                                                                                   | AC8     | A_52_P116372  | Ppp1r15b  | 0.330888 | 1.052021 | 0.32494152 | 0.304363 | 3.179387   | 1.06761028 |
| Up                                                                                   | AC15    | A_55_P2047748 | Mafg      | 6.302027 | 23.32222 | 7.54029203 | 7.444379 | 3.70075    | 1.01288396 |
| Up                                                                                   | AC15    | A_52_P608322  | Maff      | 1.75527  | 4.301041 | 1.92542523 | 2.10585  | 2.450358   | 0.91432204 |
| Up                                                                                   | AC15    | A_66_P116632  | Mafg      | 20.95441 | 64.92385 | 22.223487  | 22.55189 | 3.098338   | 0.98543799 |
| Up                                                                                   | AC15    | A_51_P263965  | Hmox1     | 3.996638 | 39.04096 | 3.84818858 | 3.640142 | 9.768451   | 1.05715352 |
| Up                                                                                   | AC15    | A_52_P517730  | Creb1     | 0.174872 | 0.425887 | 0.16604833 | 0.149407 | 2.435422   | 1.11137901 |
| Up                                                                                   | AC15    | A_55_P2029574 | Por       | 10.97785 | 24.26837 | 10.0508039 | 10.91845 | 2.210668   | 0.92053399 |
| Up                                                                                   | AC15    | A_55_P1973299 | Mapk8     | 0.00954  | 0.046004 | 0.00726867 | 0.010463 | 4.822171   | 0.69472812 |
| Up                                                                                   | AC15    | A_55_P2177026 | Mafg      | 3.258451 | 10.89147 | 3.52595289 | 3.377795 | 3.342529   | 1.04386244 |
| Up                                                                                   | AC15    | A_55_P1979728 | Atf4      | 69.20985 | 220.1977 | 65.9047571 | 67.59783 | 3.181595   | 0.97495376 |
| Up                                                                                   | AC15    | A_55_P2177023 | Mafg      | 4.859171 | 15.52057 | 5.03507755 | 5.001993 | 3.194079   | 1.0066143  |
| Up                                                                                   | AC15    | A_55_P2029687 | Hmox1     | 0.391591 | 2.93679  | 0.36483011 | 0.406271 | 7.499629   | 0.89799605 |
| Up                                                                                   | AC15    | A_52_P262219  | Fos       | 0.02987  | 0.138729 | 0.02104981 | 0.025547 | 4.64448    | 0.82396965 |
| Up                                                                                   | AC15    | A_55_P1953241 | Mafk      | 1.008209 | 3.399426 | 1.05495526 | 1.068461 | 3.371747   | 0.98735958 |
| Up                                                                                   | AC15    | A_51_P464238  | Atf4      | 1.719418 | 6.088105 | 1.55320903 | 1.679443 | 3.540794   | 0.9248357  |
| Up                                                                                   | AC27    | A_52_P298002  | Gch1      | 0.030985 | 0.087102 | 0.03810298 | 0.050047 | 2.811071   | 0.76133895 |
| Up                                                                                   | AC27    | A_55_P1982733 | Dnajc5    | 0.652284 | 2.195762 | 0.76733857 | 0.686662 | 3.366268   | 1.11749162 |
| Up                                                                                   | AC27    | A_52_P438082  | Cebpg     | 0.976975 | 3.47874  | 1.00324035 | 1.0375   | 3.560726   | 0.96697819 |
| Up                                                                                   | AC27    | A_51_P239654  | Nr4a1     | 2.880898 | 7.961378 | 3.44756511 | 3.664112 | 2.763505   | 0.94090058 |
| Up                                                                                   | AC27    | A_55_P2105858 | Atf5      | 40.97373 | 128.1007 | 43.9450359 | 49.28496 | 3.126411   | 0.89165209 |
| Up                                                                                   | AC27    | A_51_P399845  | Fgf2      | 0.027703 | 0.020044 | 0.01625011 | 0.017148 | 0.723544   | 0.94765406 |
| Up                                                                                   | AC27    | A_52_P494622  | Nr4a2     | 0.410427 | 0.833432 | 0.48319037 | 0.404568 | 2.030645   | 1.19433735 |
| Up                                                                                   | AC27    | A_55_P2007912 | Ak010878- | 0.046489 | 0.104568 | 0.04439402 | 0.031395 | 2.249311   | 1.41405506 |
| Up                                                                                   | AC27    | A_55_P1954161 | Plagl2    | 0.049102 | 0.12114  | 0.04915078 | 0.057653 | 2.46711    | 0.85252734 |
| Up                                                                                   | AC27    | A_51_P172573  | Sod2      | 122.0993 | 284.9378 | 162.135995 | 171.5328 | 2.333655   | 0.94521878 |
| Up                                                                                   | AC27    | A_55_P2091592 | Bnpl      | 0.007834 | 0.049147 | 0.00601866 | 0.011426 | 6.273199   | 0.52673784 |
| Up                                                                                   | AC27    | A_52_P662013  | Plg       | 0.011545 | 0.050791 | 0.02550551 | 0.008814 | 4.399495   | 2.89389846 |
| Up                                                                                   | AC27    | A_55_P2059352 | Col18a1   | 0.037701 | 0.150187 | 0.02512937 | 0.022259 | 3.983696   | 1.12894977 |
| Up                                                                                   | AC27    | A_65_P06147   | Fgfr3     | 0.019577 | 0.06887  | 0.02138597 | 0.029948 | 3.517887   | 0.71409771 |
| Up                                                                                   | AC27    | A_52_P161495  | Bcl6      | 1.71931  | 3.577695 | 2.33103732 | 2.836165 | 2.08089    | 0.82189762 |
| Up                                                                                   | AC27    | A_51_P286496  | Il2rb     | 0.019163 | 0.060247 | 0.00982462 | 0.026342 | 3.143929   | 0.37296654 |
| Up                                                                                   | AC27    | A_51_P320089  | Gclm      | 0.563401 | 1.803172 | 0.61313319 | 0.592479 | 3.200512   | 1.03486068 |
| Up                                                                                   | AC27    | A_55_P1973906 | Trp53inp1 | 0.078667 | 0.214602 | 0.15181034 | 0.153135 | 2.727973   | 0.99135089 |
| Up                                                                                   | AC27    | A_55_P1986282 | Cdkn1a    | 0.065432 | 0.255879 | 0.04235271 | 0.046742 | 3.910622   | 0.90609549 |
| Up                                                                                   | AC27    | A_51_P171999  | Apoe      | 0.460437 | 3.02104  | 0.49736414 | 0.525076 | 6.561248   | 0.94722348 |
| Up                                                                                   | AC27    | A_55_P2128144 | Il19      | 0.050181 | 0.375325 | 0.0452839  | 0.076538 | 7.479501   | 0.59165398 |
| Up                                                                                   | AC27    | A_51_P214197  | Stk17b    | 1.068686 | 2.619007 | 0.78313253 | 0.775445 | 2.450681   | 1.00991346 |
| Up                                                                                   | AC27    | A_55_P2124791 | Col18a1   | 0.046352 | 0.138344 | 0.01177732 | 0.021116 | 2.984671   | 0.55774207 |
| Up                                                                                   | AC27    | A_52_P503361  | Dcun1d3   | 0.076731 | 0.179961 | 0.08827262 | 0.094993 | 2.34537    | 0.92925039 |
| Up                                                                                   | AC27    | A_66_P139159  | Hras1     | 0.056633 | 0.116411 | 0.05164198 | 0.052281 | 2.055523   | 0.98778489 |
| Up                                                                                   | AC27    | A_52_P31543   | Btg2      | 0.131118 | 0.389231 | 0.17435501 | 0.166094 | 2.968562   | 1.04973698 |
| Up                                                                                   | AC27    | A_55_P2273439 | Nlrp3     | 0.011972 | 0.03723  | 0.01241453 | 0.008439 | 3.109826   | 1.47113771 |
| Up                                                                                   | AC27    | A_55_P2149011 | Hif1a     | 0.034633 | 0.092766 | 0.05551654 | 0.055185 | 2.678515   | 1.00601408 |
| Up                                                                                   | AC27    | A_51_P302358  | Ltb       | 0.040048 | 0.751279 | 0.00611671 | 0.008339 | 18.75943   | 0.73347043 |
| Up                                                                                   | AC27    | A_51_P209527  | Bcl10     | 3.388254 | 7.413975 | 2.82373989 | 3.084823 | 2.188141   | 0.91536517 |
| Up                                                                                   | AC27    | A_52_P477431  | Mnt       | 9.432283 | 20.27898 | 12.761821  | 12.43715 | 2.149954   | 1.02610474 |
| Up                                                                                   | AC27    | A_55_P2145804 | Aen       | 20.92834 | 42.91484 | 19.8492199 | 19.39645 | 2.050561   | 1.02334308 |
| Up                                                                                   | AC27    | A_51_P118132  | Skil      | 0.986185 | 1.797453 | 0.61821313 | 0.700933 | 1.822633   | 0.88198657 |
| Up                                                                                   | AC27    | A_55_P2135311 | Nol3      | 0.032877 | 0.07107  | 0.02319369 | 0.137809 | 2.161686   | 0.16830283 |
| Up                                                                                   | AC27    | A_52_P117576  | Casp3     | 0.113615 | 0.246419 | 0.10033939 | 0.113127 | 2.168902   | 0.8869588  |
| Up                                                                                   | AC27    | A_55_P1997756 | Il6       | 0.798655 | 8.069252 | 0.84670011 | 1.242172 | 10.10355   | 0.68162857 |
| Up                                                                                   | AC27    | A_55_P1976928 | Unc13d    | 0.030085 | 0.268786 | 0.035977   | 0.035505 | 8.934173   | 1.0132871  |
| Up                                                                                   | AC27    | A_55_P2074337 | Ngf       | 1.435041 | 4.647505 | 0.89049815 | 1.01432  | 3.238586   | 0.87792642 |
| Up                                                                                   | AC27    | A_55_P2022399 | Ghrl      | 0.055887 | 0.315348 | 0.04412743 | 0.045425 | 5.642628   | 0.97143058 |
| Up                                                                                   | AC27    | A_52_P236448  | Ngfr      | 0.035773 | 0.053258 | 0.01919406 | 0.030507 | 1.488758   | 0.62917336 |
| Up                                                                                   | AC27    | A_55_P1980287 | Birc3     | 0.777094 | 1.561414 | 0.60258854 | 0.793052 | 2.009299   | 0.75983439 |
| Up                                                                                   | AC27    | A_51_P128320  | ENSMUST   | 0.00868  | 0.040013 | 0.00656086 | 0.009006 | 4.609823   | 0.72851314 |
| Up                                                                                   | AC27    | A_52_P93933   | Mcl1      | 2.283456 | 5.743419 | 2.96704128 | 2.491059 | 2.51523    | 1.19107635 |
| Up                                                                                   | AC27    | A_55_P2061243 | TC165149  | 0.050561 | 0.120163 | 0.04630132 | 0.052517 | 2.376585   | 0.88164245 |
| Up                                                                                   | AC27    | A_51_P164420  | Eef1e1    | 1.633212 | 3.543456 | 1.460519   | 1.3297   | 2.169624   | 1.09838264 |
| Up                                                                                   | AC27    | A_55_P2045896 | Gdnf      | 6.229471 | 17.49638 | 7.65934753 | 8.055805 | 2.808646   | 0.95078609 |
| Up                                                                                   | AC27    | A_55_P2181191 | Btg1      | 1.93433  | 5.433085 | 1.55991155 | 1.416479 | 2.808769   | 1.1012602  |
| Up                                                                                   | AC27    | A_55_P2109382 | Adora2a   | 0.027009 | 0.085589 | 0.10861416 | 0.010963 | 3.168898   | 9.90693509 |
| Up                                                                                   | AC27    | A_55_P2001489 | Il19      | 0.023072 | 0.144995 | 0.02536985 | 0.04291  | 6.284471   | 0.59123784 |
| Up                                                                                   | AC27    | A_51_P257934  | Tnfsf13b  | 0.013652 | 0.108292 | 0.03417564 | 0.022082 | 7.932442   | 1.54767709 |
| Up                                                                                   | AC27    | A_55_P2122884 | Ptcr      | 0.009179 | 0.301973 | 0.00692707 | 0.009813 | 32.89723   | 0.70587714 |
| Up                                                                                   | AC27    | A_65_P07038   | Ddx20     | 0.042765 | 0.129307 | 0.0782146  | 0.050077 | 3.023651   | 1.56187877 |
| Up                                                                                   | AC27    | A_51_P430766  | Il10      | 0.014953 | 0.016941 | 0.00896804 | 0.019111 | 1.132937   | 0.46926475 |
| Up                                                                                   | AC27    | A_55_P2129309 | Foxo3     | 0.063605 | 0.136809 | 0.03620455 | 0.054516 | 2.150925   | 0.66410414 |
| Up                                                                                   | AC27    | A_52_P510215  | Traf6     | 0.291237 | 0.632477 | 0.30822022 | 0.317119 | 2.171693   | 0.97193834 |
| Up                                                                                   | AC27    | A_55_P1966102 | Nme5      | 0.069648 | 0.155708 | 0.07337522 | 0.068221 | 2.235638   | 1.07554844 |
| Up                                                                                   | AC27    | A_55_P2064442 | Pabpn1    | 14.50049 | 29.57034 | 15.5549192 | 15.60059 | 2.039265   | 0.99707256 |
| Up                                                                                   | AC27    | A_55_P1969002 | Tbx3      | 22.29411 | 45.15145 | 25.521298  | 25.17617 | 2.025263   | 1.01370846 |
| Up                                                                                   | AC27    | A_51_P451338  | Jag2      | 0.007395 | 0.052541 | 0.0058343  | 0.007681 | 7.104733   | 0.75959326 |
| Up                                                                                   | AC27    | A_55_P2173183 | Cdk5r1    | 0.260285 | 1.309842 | 0.22427414 | 0.23873  | 5.032336   | 0.93944754 |
| Up                                                                                   | AC27    | A_51_P175580  | Trp53inp1 | 1.658082 | 5.352966 | 3.56049074 | 3.701679 | 3.228409   | 0.96185831 |
| Up                                                                                   | AC27    | A_55_P2027836 | Tnfrsf10b | 0.660363 | 3.332021 | 0.63640232 | 0.724121 | 5.045743   | 0.87886184 |
| Up                                                                                   | AC27    | A_55_P2037236 | ENSMUST   | 0.014273 | 0.040241 | 0.02401214 | 0.066039 | 2.819457   | 0.36360658 |
| Up                                                                                   | AC27    | A_55_P1983508 | Nr4a2     | 0.105042 | 0.220553 | 0.10279477 | 0.098277 | 2.099675   | 1.04597096 |
| Up                                                                                   | AC27    | A_55_P2021084 | ENSMUST   | 0.018478 | 0.041534 | 0.01939607 | 0.022363 | 2.247755   | 0.86732704 |
| Up                                                                                   | AC27    | A_55_P2147427 | Prdx1     | 37.08649 | 93.40484 | 39.4667961 | 39.15499 | 2.518568   | 1.00796336 |
| Up                                                                                   | AC27    | A_52_P522023  | Alkbh1    | 0.325197 | 1.069729 | 0.24800883 | 0.24854  | 3.289475   | 0.99786116 |
| Up                                                                                   | AC27    | A_55_P2177113 | Nkx3-2    | 0.024325 | 0.07634  | 0.01855451 | 0.027469 | 3.138328   | 0.67546054 |
| Up                                                                                   | AC27    |               |           |          |          |            |          |            |            |
